# Supplementary material
Source: HighWire-hosted journal article supplement (https://jnm.snmjournals.org/highwire/filestream/95476/field_highwire_adjunct_files/0/220202_Supplemental_Data.pdf)
Supplement: 220202_Supplemental_Data.pdf [file 220202_Supplemental_Data.pdf]

**SUPPLEMENTAL TABLE 1: Patient characteristics**

|                                   | <b>Tumor Tattooing</b>             | <b>Standard SN procedure</b>     | <b>P-value</b> |
|-----------------------------------|------------------------------------|----------------------------------|----------------|
| <b>No. of included patients</b>   | 12                                 | 19                               | 0.587          |
| <b>Male/female</b>                | 4/8                                | 11/8                             | 0.273          |
| <b>Average age (years) ±SD</b>    | 61±11 (median 62.5)<br>range 44-76 | 59±10 (median 60)<br>range 42-75 |                |
| <b>Tumor stage</b>                |                                    |                                  | 1.000          |
| <b>T1</b>                         | 8                                  | 13                               |                |
| <b>T2</b>                         | 3                                  | 5                                |                |
| <b>T2-3</b>                       | 1                                  | 1                                |                |
| <b>Tumor location oral tongue</b> |                                    |                                  | 0.338          |
| <b>Lateral, L</b>                 | 6                                  | 7                                |                |
| <b>Lateral, R</b>                 | 5                                  | 12                               |                |
| <b>Mid</b>                        | 1                                  | 0                                |                |

No. = number; SD = standard deviation; T = tumor stage; L = left; R = right.

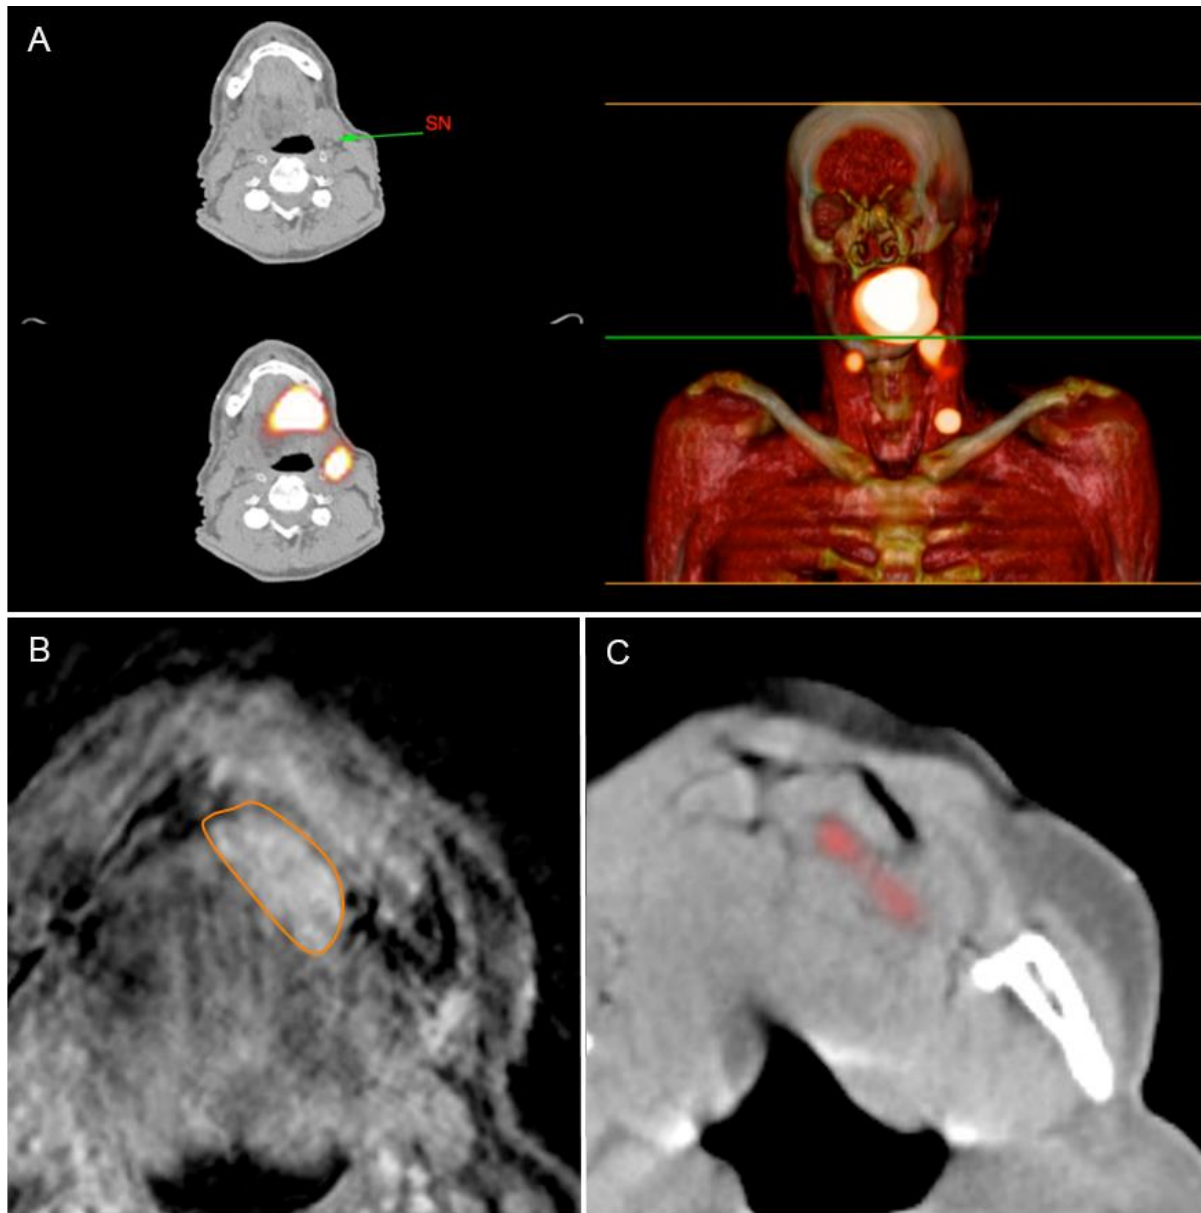

**SUPPLEMENTAL FIGURE 1.** Pre-operative imaging. (A) With SPECT/CT imaging the 3D position of the SNs can be visualized. (B) Magnetic Resonance Imaging of the tongue reveals the location of the tumor (orange area). (C) On SPECT/CT imaging separate injection depots were visualized after reducing the signal.
